# Supplementary material
Source: PubMed Central journal article supplement (PMC2788832)

**Supplementary Table 1. Primers for quantitative real-time PCR**

| Gene  | Sequences of primers (5' to 3')                            | GenBank Accession No. |
|-------|------------------------------------------------------------|-----------------------|
| ACSL1 | For: CAGAACATGTGGGTGTCCAG<br>Rev: GTTACCAACATGGGCTGCTT     | NM_007981             |
| ACSL3 | For: AACCTGTCAGTTCCAAACCG<br>Rev: GCCAATTATAGTGCCCCAGA     | NM_028817.2           |
| ACSL4 | For: CTGGAAAGCAAACCTGAAGGC<br>Rev: AGGGATACGTTCACTGGC      | NM_207625.2           |
| ACSL5 | For: GATCGGGGTAAAGGGATCAT<br>Rev: GGCAAGCTCTACTCGTTTGG     | NM_027976.2           |
| ACSL6 | For: AAAGGCTAAGAGACCGGAGC<br>Rev: GTCAGGAAAGGCTCAGTTGC     | NM_144823.4           |
| FATP2 | For: ATTCGTGCCAAGTCTCTGCT<br>Rev: GTAAAAGACGGACACGGCAT     | NM_011978.2           |
| FATP4 | For: TATGGCTTCCCTGGTGTACTAT<br>Rev: TTCTTCCGGATCACCACAGTCA | NM_011989             |
| FATP5 | For: GCCTATGCCACACCTCATTT<br>Rev: ACCCGGACAACCTTGTGAAG     | NM_009512.1           |
| GPAT1 | For: AGCAAGTCCTGCGCTATCAT<br>Rev: CTCGTGTGGGTGATTGTGAC     | NM_008149             |
| GPAT2 | For: AAGAAAGAGGTACAGCGTATCC<br>Rev: GTGGAGAGCCCTCCTGCACAG  | NM_001081089.1        |
| GPAT3 | For: CTTTGAAATCGGAGGAACCA<br>Rev: TTTGCAAACCTGAACTGCGTC    | NM_172715.3           |
| GPAT4 | For: GGCATGGTGACGTACCTTCT<br>Rev: GCTTCAGCCAGCACAAGAC      | NM_018743.3           |

**Supplementary Table 2. Physiological measurements and liver and plasma metabolites in male 12-14 wk old *Acs11<sup>L-/-</sup>* and control mice**

|                                  | 14% fat diet   |              |
|----------------------------------|----------------|--------------|
|                                  | Control (n=11) | KO (n=11)    |
| Physiologic parameters           |                |              |
| Body weight (g)                  | 28.7 ± 0.4     | 28.6 ± 0.5   |
| Liver weight (g)                 | 1.35 ± 0.03    | 1.33 ± 0.03  |
| Liver/body weight (%)            | 4.67 ± 0.07    | 4.61 ± 0.11  |
| Inguinal adipose (g)             | 0.37 ± 0.04    | 0.29 ± 0.02  |
| Inguinal adipose/body weight (%) | 1.27 ± 0.13    | 1.01 ± 0.05  |
| Gonadal adipose (g)              | 0.45 ± 0.04    | 0.38 ± 0.03  |
| Gonadal adipose/body weight (%)  | 1.53 ± 0.14    | 1.31 ± 0.09  |
| Brown adipose (g)                | 0.06 ± 0.004   | 0.06 ± 0.003 |
| Brown adipose/body weight (%)    | 0.22 ± 0.01    | 0.21 ± 0.01  |
| Plasma metabolites               |                |              |
| Glucose (mg/dl)                  | 161 ± 9        | 171 ± 14     |
| NEFA (mEq/l)                     | 0.49 ± 0.10    | 0.44 ± 0.09  |
| Insulin (ng/ml)                  | 1.55 ± 0.17    | 1.32 ± 0.17  |
| TAG (mg/dl)                      | 61 ± 7         | 53 ± 5       |
| Total cholesterol (mg/dl)        | 73 ± 2         | 72 ± 3       |
| β-hydroxybutyrate (mM)           | 0.12 ± 0.01    | 0.14 ± 0.02  |
| Liver metabolites                |                |              |
| TAG (mg/g liver)                 | 6.8 ± 0.7      | 6.1 ± 0.6    |
| Total cholesterol (mg/g liver)   | 2.5 ± 0.1      | 2.8 ± 0.2    |
| Glycogen (μmol/g liver)          | 60 ± 11        | 67 ± 15      |

Mice were fasted for 4 h. Data represent means ± SEM. The number of animals in each group is indicated in parentheses. Statistical comparisons were determined by Student's t-test.

**Supplementary Table 3. Physiological measurements and liver and plasma metabolites in 15-17 wk old male *Acs11<sup>L-/-</sup>* and control mice after a 24 h fast.**

|                                  | 24 h fast     |              |
|----------------------------------|---------------|--------------|
|                                  | Control (n=9) | KO (n=13)    |
| Physiologic parameters           |               |              |
| Initial body weight (g)          | 31.3 ± 0.7    | 32.4 ± 0.5   |
| Weight loss during 24 h fast (g) | 3.07 ± 0.16   | 3.04 ± 0.10  |
| Liver weight (g)                 | 1.13 ± 0.02   | 1.17 ± 0.02  |
| Liver/body weight (%)            | 4.00 ± 0.10   | 4.01 ± 0.06  |
| Inguinal adipose (g)             | 0.25 ± 0.03   | 0.28 ± 0.03  |
| Inguinal adipose/body weight (%) | 0.87 ± 0.09   | 0.96 ± 0.09  |
| Gonadal adipose (g)              | 0.40 ± 0.05   | 0.46 ± 0.06  |
| Gonadal adipose/body weight (%)  | 1.38 ± 0.17   | 1.55 ± 0.19  |
| Brown adipose (g)                | 0.05 ± 0.002  | 0.05 ± 0.002 |
| Brown adipose/body weight (%)    | 0.18 ± 0.01   | 0.18 ± 0.01  |
| Plasma metabolites               |               |              |
| Glucose (mg/dl)                  | 121 ± 13      | 126 ± 7      |
| NEFA (mEq/l)                     | 0.58 ± 0.07   | 0.64 ± 0.04  |
| Insulin (ng/ml)                  | 0.19 ± 0.10   | 0.39 ± 0.11  |
| TAG (mg/dl)                      | 39 ± 4        | 47 ± 7       |
| Total cholesterol (mg/dl)        | 55 ± 2        | 55 ± 2       |
| β-hydroxybutyrate (mM)           | 0.66 ± 0.09   | 0.61 ± 0.06  |
| Liver metabolites                |               |              |
| TAG (mg/g liver)                 | 15.6 ± 1.7    | 15.3 ± 1.8   |
| Total cholesterol (mg/g liver)   | 7.2 ± 0.5     | 6.8 ± 0.3    |
| Glycogen (μmol/g liver)          | 0.51 ± 0.17   | 0.72 ± 0.34  |

Mice were fasted for 24 h. Data represent means ± SEM. The number of animals in each group is indicated in parentheses. Statistical comparisons were determined by Student's t-test.

**Supplementary Table 4. Physiologic measurements and plasma metabolites in 22-26 week old male *AcsII*<sup>L-/-</sup> and control mice fed a high-fat or a control diet for 14-18 weeks**

|                                     | 10% fat diet (control) |              | 45% fat diet (high fat) |               |
|-------------------------------------|------------------------|--------------|-------------------------|---------------|
|                                     | Control<br>(n=11)      | KO<br>(n=12) | Control<br>(n=13)       | KO<br>(n=11)  |
| Physiologic parameters <sup>1</sup> |                        |              |                         |               |
| Body weight (g)                     | 30.7 ± 0.7             | 29.8 ± 0.6   | 37.2 ± 1.6 ‡            | 39.3 ± 1.7 ‡  |
| Liver weight (g)                    | 1.20 ± 0.05            | 1.20 ± 0.05  | 1.27 ± 0.06             | 1.28 ± 0.08   |
| Liver/body weight (%)               | 3.92 ± 0.15            | 4.04 ± 0.16  | 3.35 ± 0.12 ‡           | 3.27 ± 0.12 § |
| Inguinal adipose (g)                | 0.46 ± 0.03            | 0.39 ± 0.03  | 1.29 ± 0.18 ‡           | 1.48 ± 0.19 ‡ |
| Inguinal adipose/body wt %          | 1.50 ± 0.07            | 1.32 ± 0.10  | 3.11 ± 0.36 §           | 3.62 ± 0.37 § |
| Gonadal adipose (g)                 | 0.55 ± 0.03            | 0.49 ± 0.04  | 1.43 ± 0.16 ‡           | 1.75 ± 0.21 ‡ |
| Gonadal adipose/body wt (%)         | 1.79 ± 0.10            | 1.64 ± 0.11  | 3.67 ± 0.37 §           | 4.36 ± 0.43 § |
| Brown adipose (g)                   | 0.10 ± 0.01            | 0.09 ± 0.01  | 0.14 ± 0.02 †           | 0.15 ± 0.02 † |
| Brown adipose/body wt (%)           | 0.31 ± 0.01            | 0.31 ± 0.02  | 0.36 ± 0.03             | 0.36 ± 0.03   |
| Total fat (% of body wt)            | 11.7 ± 0.9             | 11.3 ± 0.8   | 26.4 ± 2.1 §            | 24.9 ± 1.9 §  |
| Lean mass (% of body wt)            | 79.6 ± 0.9             | 79.4 ± 0.9   | 67.1 ± 1.7 §            | 68.0 ± 1.6 §  |
| Plasma metabolites <sup>1</sup>     |                        |              |                         |               |
| Glucose (mg/dl)                     | 179 ± 9                | 166 ± 8      | 176 ± 10                | 168 ± 6       |
| NEFA (mEq/l)                        | 0.33 ± 0.03            | 0.29 ± 0.03  | 0.35 ± 0.03             | 0.42 ± 0.05 † |
| Insulin (ng/ml)                     | 1.03 ± 0.31            | 0.58 ± 0.11  | 1.73 ± 0.35             | 2.73 ± 0.57 ‡ |
| TAG (mg/dl)                         | 27 ± 2                 | 30 ± 2       | 29 ± 3                  | 26 ± 2        |
| Total cholesterol (mg/dl)           | 79 ± 3                 | 78 ± 3       | 99 ± 4 ‡                | 112 ± 5 ‡*    |
| β-hydroxybutyrate (mM)              | 0.10 ± 0.01            | 0.11 ± 0.01  | 0.14 ± 0.04             | 0.20 ± 0.04   |
| Liver metabolites <sup>1</sup>      |                        |              |                         |               |
| TAG (mg/g liver)                    | 29.9 ± 3.3             | 22.4 ± 2.2   | 41.2 ± 7.8              | 53.5 ± 4.7 †  |
| Total cholesterol (mg/g liver)      | 8.2 ± 0.7              | 7.2 ± 0.7    | 6.7 ± 1.1               | 8.5 ± 0.7     |
| Glycogen (μmol/g liver)             | 92 ± 24                | 103 ± 41     | 44 ± 8 †                | 40 ± 11 †     |

† p<0.05, ‡ p<0.01, § p<0.001 compared with 10% fat control diet in the same genotype (Two-way ANOVA)

\* p<0.05 compared with control mice fed the same diet (Two-way ANOVA)

<sup>1</sup> Samples were obtained after a 4 h fast. Data represent means ± SEM. The number of animals in each group is indicated in parentheses.

## Supplementary Figures

**Supplementary Fig. 1. *Acs11<sup>L-/-</sup>* mice were not protected from insulin resistance induced by a high-fat diet .** OGTT and ITT were performed in control and *Acs11<sup>L-/-</sup>* mice after they were fed either a matched 10% fat diet (SD, Research Diets D12450B) or a 45% fat diet (HFD, Research Diets D12451) for 12 -14 weeks. Mice (20 weeks old) were fasted for 4 h before the tests. **A) OGTT in *Acs11<sup>L-/-</sup>* mice.** Male and female mice were gavaged with 2.5 g glucose/kg body weight and blood glucose was measured at the indicated time points. Data show means  $\pm$  SEM from 6-12 mice per group. **B) ITT in *Acs11<sup>L-/-</sup>* mice.** Male and female mice (22 weeks old) were given 0.75 U insulin/kg body weight IP and blood glucose was measured at the indicated time points. Data show means  $\pm$  SEM from 10-14 mice per group.

**Supplementary Fig. 2. Insulin stimulated phosphorylation of AKT in *Acs11<sup>L-/-</sup>* and control mice.** 5 mo old male mice fed a standard chow diet (Prolab Isopro<sup>®</sup>RMH 3000, LabDiet) were fasted overnight (16h), anesthetized, and injected with either phosphate buffered saline (PBS) or insulin (1 U/kg body weight) via the portal vein. Livers were freeze-clamped 2 min later and analyzed for AKT serine473 phosphorylation by Western blot with antibody against phosphorylated AKT and total AKT. Densitometry analysis of phosphorylated AKT immunoblots were normalized to total AKT. Data show means  $\pm$  SEM from 5-9 mice per group. \*\*  $p < 0.01$  versus PBS treated mice in the same genotype (Two-way ANOVA).

Supplementary Fig. 1

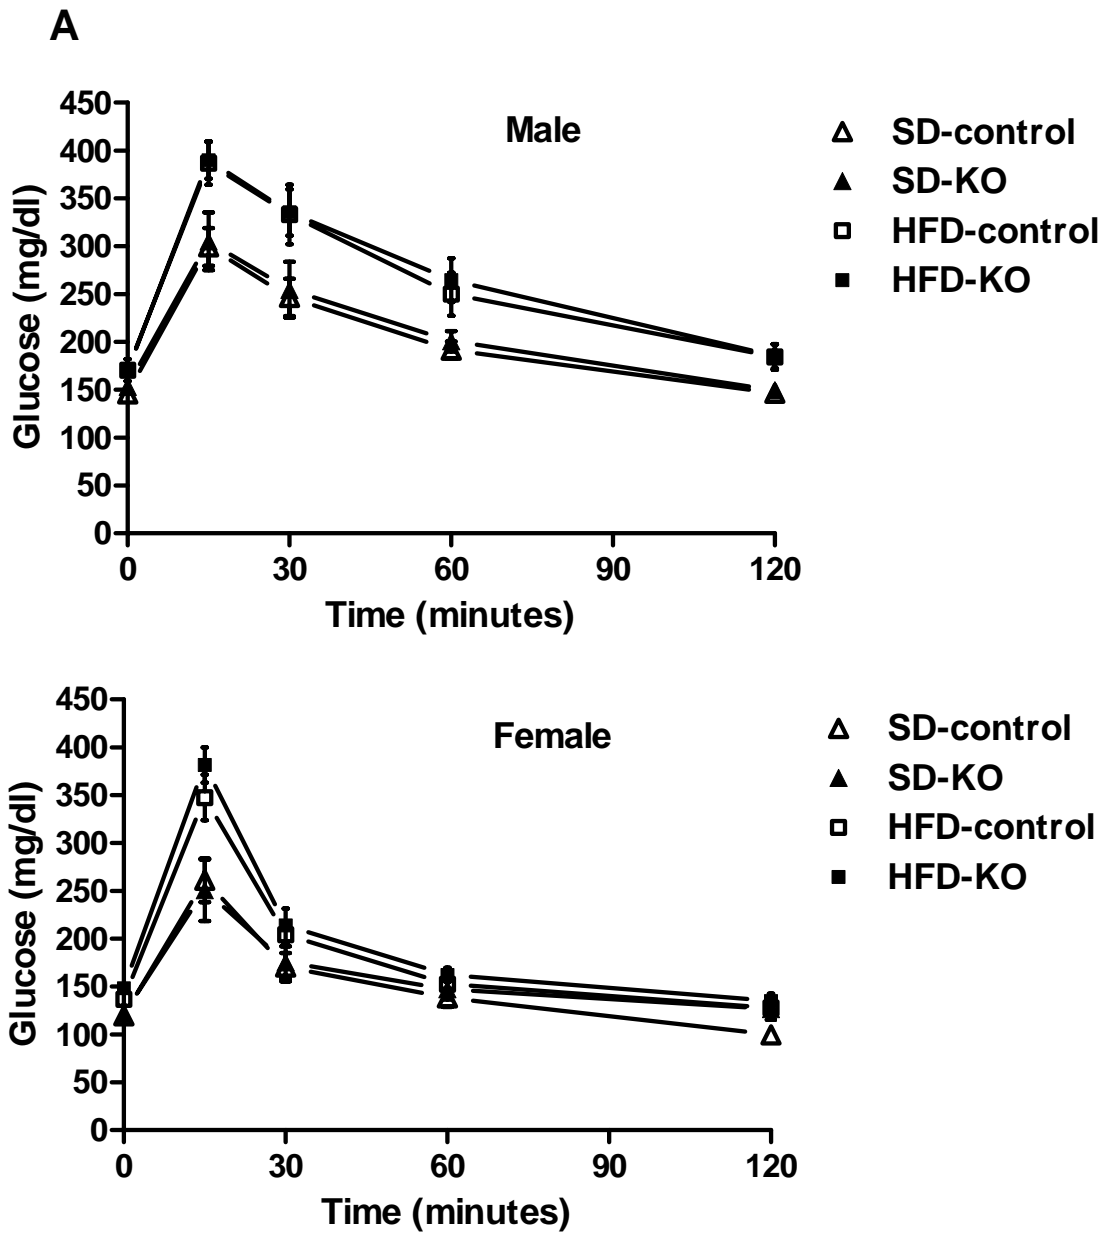

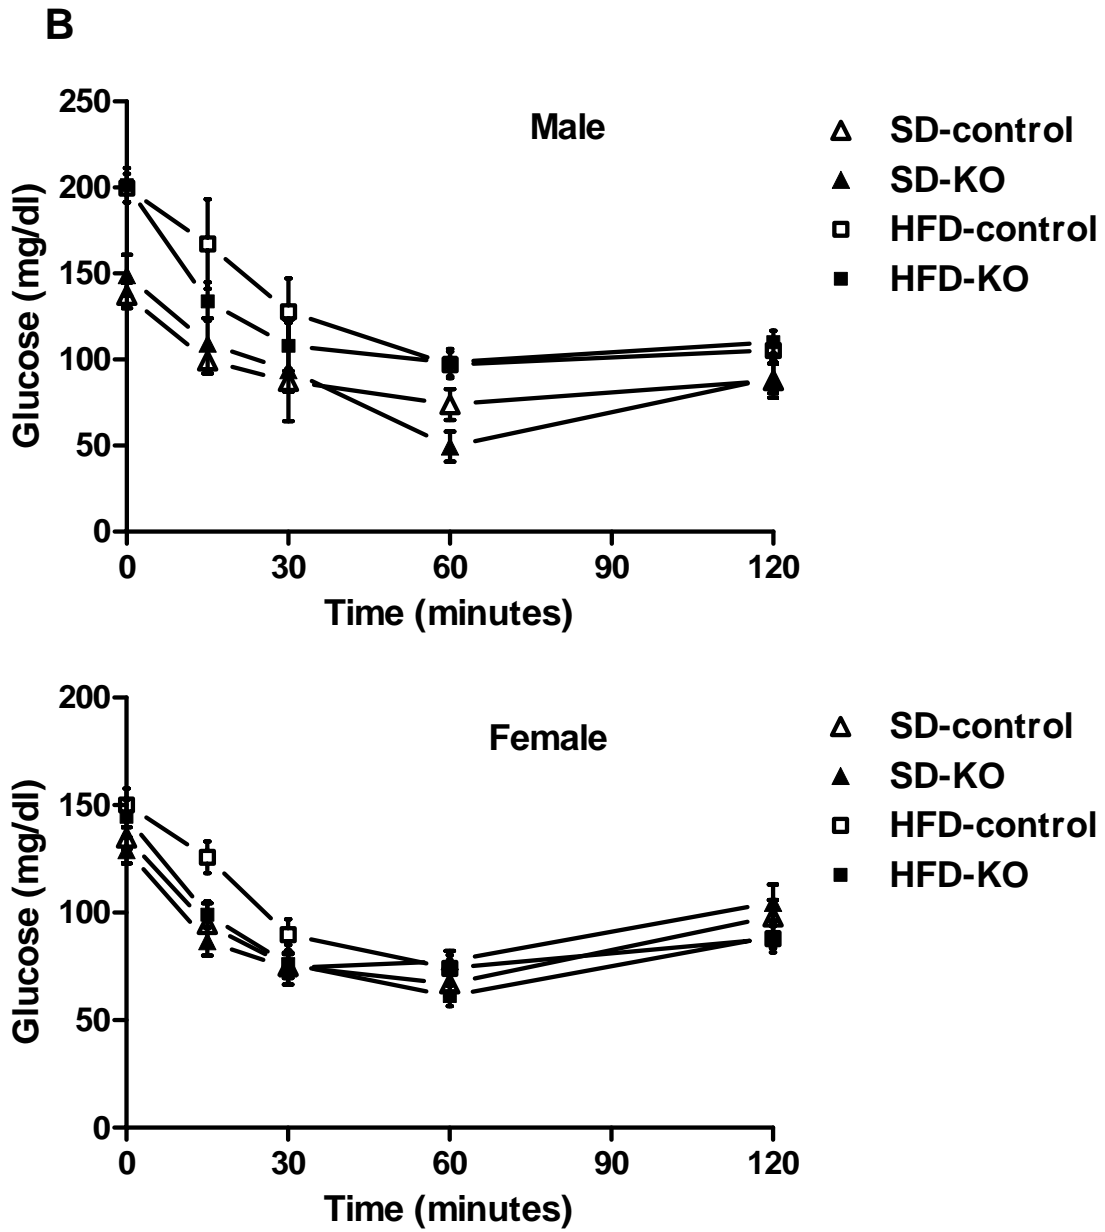

Supplementary Fig. 1, cont.

Supplementary Fig. 2

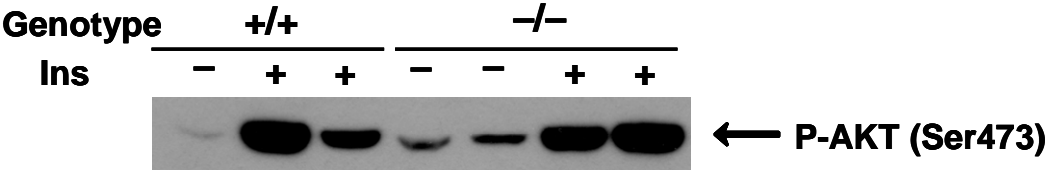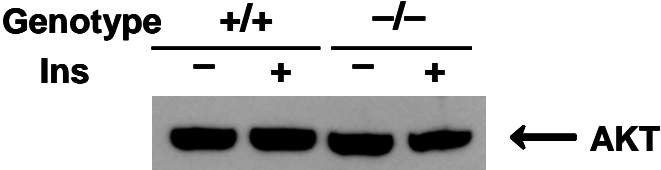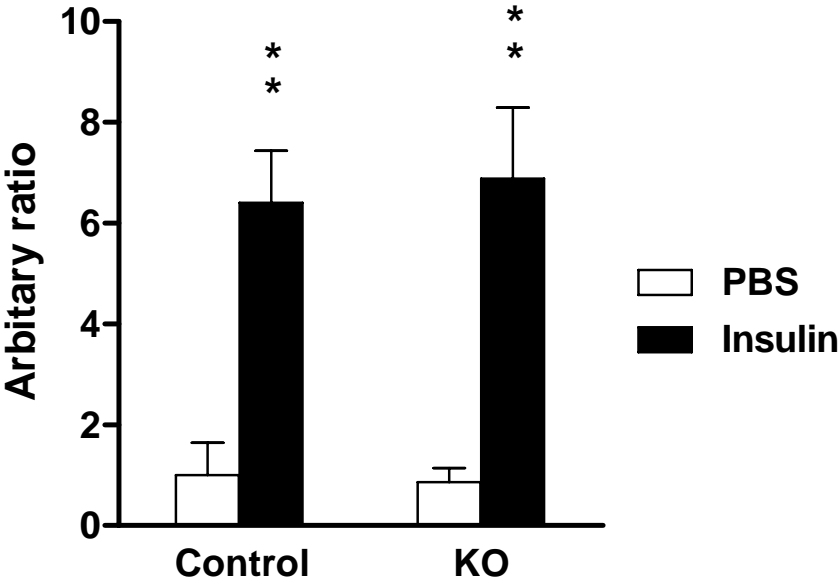

Supplement: supp_M109.022467_jbc.M109.022467-1.pdf [file supp_M109.022467_jbc.M109.022467-1.pdf]
